# Supplementary material
Source: PubMed Central journal article supplement (PMC5467993)
Supplement: koni-06-05-1313369-s001.pdf [file koni-06-05-1313369-s001.pdf]

**Supplemental Figure 1**

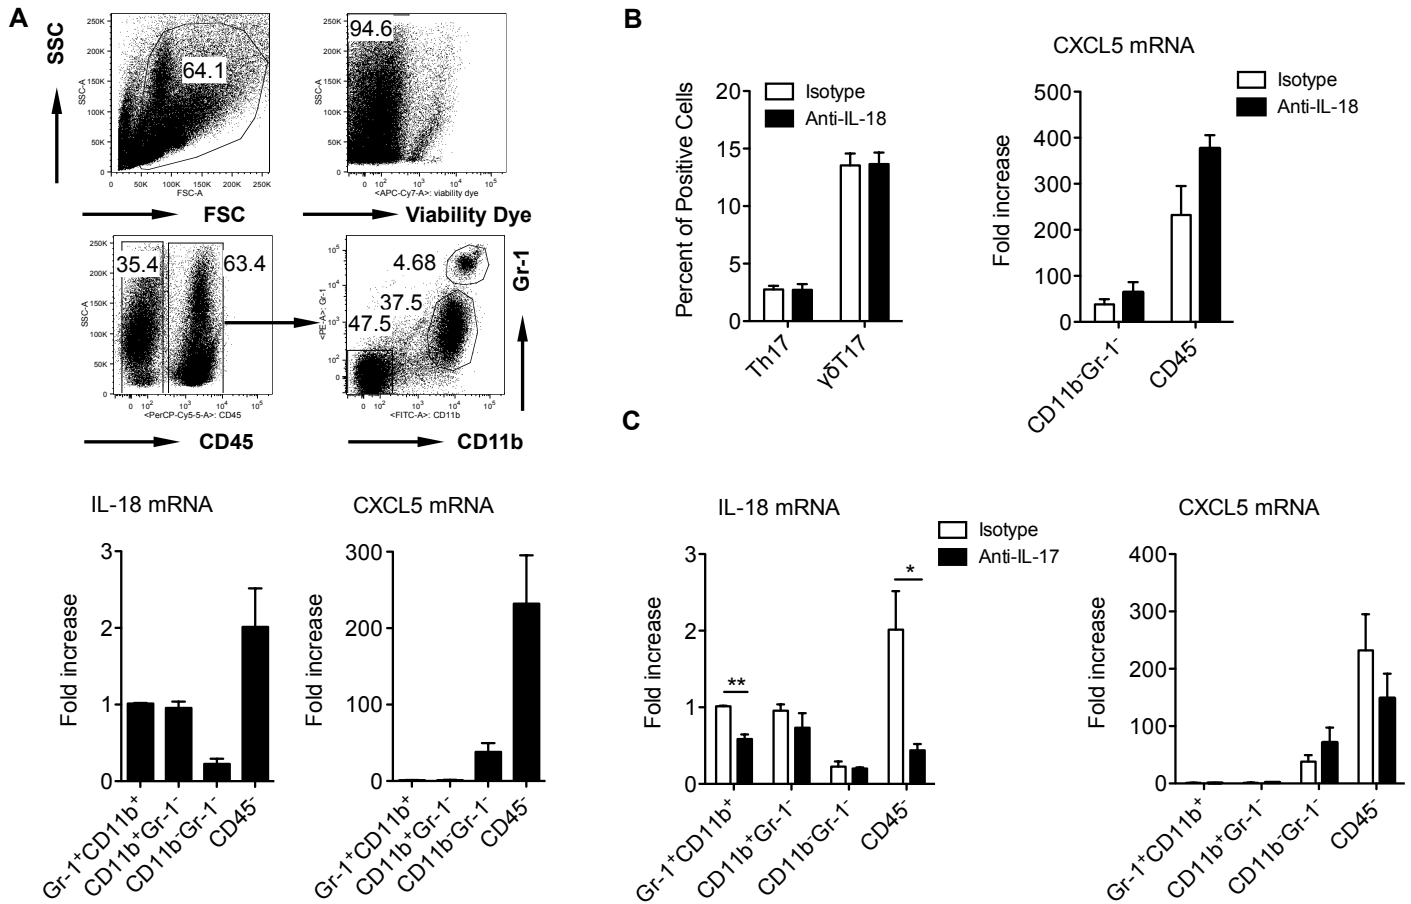

**Supplemental Figure 1. Cellular sources of IL-18 and CXCL5 expression in the gut.** (A) Four different cellular populations CD45 negative cells, CD45<sup>+</sup>Gr-1<sup>+</sup>CD11b<sup>+</sup>, CD45<sup>+</sup>CD11b<sup>+</sup>Gr-1<sup>-</sup>, and CD45<sup>+</sup>CD11b<sup>-</sup>Gr-1<sup>-</sup> were sorted from DSS-treated mouse LPLs. Gating strategy is shown. Cells were put into Trizol and the mRNA expression levels of IL-18 and CXCL5 were determined by real-time PCR analysis (n=2-3). (B, C) Mice were treated with IL-18 (B) or IL-17 neutralizing mAbs as indicated in the material and methods. Th17/ $\gamma\delta$ T17 cells and CXCL5 mRNA expression level in the IL-18 neutralizing mAb-treated mice (B) as well as IL-18 and CXCL5 mRNA expression levels in IL-17 neutralizing mAb-treated mice are shown. \*P<0.05, \*\*P<0.01.

## Supplemental Figure 2

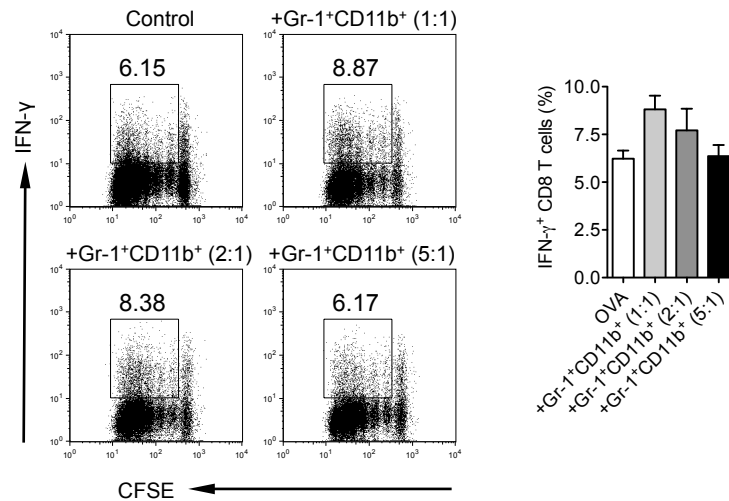

**Supplemental Figure 2. Gr-1<sup>+</sup>CD11b<sup>+</sup> myeloid cells from naïve mice do not have immunosuppressive activity.** Gr-1<sup>+</sup>CD11b<sup>+</sup> myeloid cells were sorted from naïve mouse LPLs and then co-cultured with CFSE-labeled OT-1 splenocytes at indicated ratios in the presence of OVA for 3 days. Cells were stimulated with PMA+ionomycin and intracellular IFN- $\gamma$  staining was performed. Cells were gated on CD8<sup>+</sup> cells. Representative dot plots and summarized IFN- $\gamma$ -producing CD8 T cells are shown.
